# Supplementary material for: p-Phenylenediamine-derived carbon nanodots for probing solvent interactions
Source: Royal Society of Chemistry journal article supplement (doi:10.1039/d3na00799e), 2024-01-01
Supplement: d3na00799e1.pdf [file d3na00799e1.pdf]

## Supplementary Information

### ***p*-Phenylenediamine derived carbon nanodots for probing solvent interactions**

Nidhisha V.,<sup>a</sup> Ritu Gopal,<sup>a</sup> Anjali C.,<sup>a</sup> Amrutha T. P.,<sup>a</sup> Arunima K. K.,<sup>a</sup>  
Vakayil K. Praveen,<sup>b,c</sup> Renuka Neeroli Kizhakayil<sup>a,\*</sup>

<sup>a</sup>Advanced Materials Research Centre, Department of Chemistry, University of Calicut,  
Kerala 673635, India. \*E-mail: renuka@uoc.ac.in

<sup>b</sup>Photosciences and Photonics Section, Chemical Sciences and Technology Division,  
CSIR-National Institute for Interdisciplinary Science and Technology (CSIR-NIIST),  
Thiruvananthapuram, Kerala 695019, India

<sup>c</sup>Academy of Scientific and Innovative Research (AcSIR), Ghaziabad 201002, India

**Table S1** Fluorescence emission maximum of PD-CNDs,  $\lambda_{\max}(\text{em})$  in different primary alcohols and the dielectric constant values of respective primary alcohols.

| Sl. No. | Name       | $\lambda_{\max}(\text{em})$ (nm) | Dielectric Constant ( $\epsilon$ ) |
|---------|------------|----------------------------------|------------------------------------|
| 1       | Methanol   | 606.16                           | 32.60                              |
| 2       | Ethanol    | 596.68                           | 24.55                              |
| 3       | 1-Propanol | 592.89                           | 20.10                              |
| 4       | 1-Butanol  | 593.10                           | 17.80                              |
| 5       | 1-Pentanol | 590.2                            | 15.30                              |
| 6       | 1-Hexanol  | 591.46                           | 13.03                              |
| 7       | 1-Heptanol | 590.54                           | 11.75                              |

**Table S2** The methanol content (%), fluorescence emission maximum of PD-CNDs,  $\lambda_{\max}(\text{em})$  and dielectric constant of methanol-1,4-dioxane mixture.

| Sl. No. | Methanol Content (%) | $\lambda_{\max}(\text{em})$ (nm) | Dielectric Constant ( $\epsilon$ ) |
|---------|----------------------|----------------------------------|------------------------------------|
| 1       | 0                    | 565.00                           | 2.209                              |
| 2       | 10                   | 584.07                           | 3.500                              |
| 3       | 20                   | 588.44                           | 5.215                              |
| 4       | 30                   | 594.5                            | 7.622                              |
| 5       | 40                   | 597.52                           | 10.408                             |
| 6       | 50                   | 599.65                           | 13.560                             |
| 7       | 60                   | 600.57                           | 16.945                             |
| 8       | 70                   | 601.77                           | 20.672                             |
| 9       | 80                   | 603.59                           | 24.440                             |
| 10      | 90                   | 605.41                           | 28.516                             |
| 11      | 100                  | 606.00                           | 32.634                             |

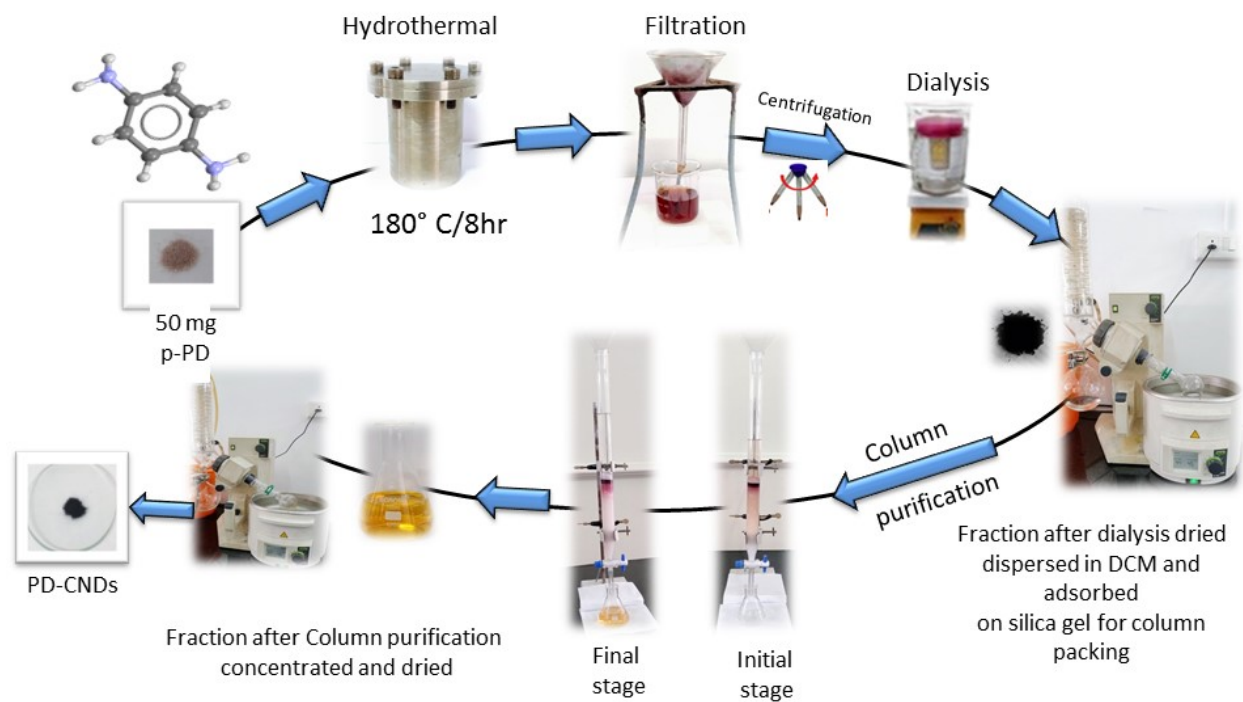

**Fig. S1** Schematic representation of PD-CNDs synthesis.

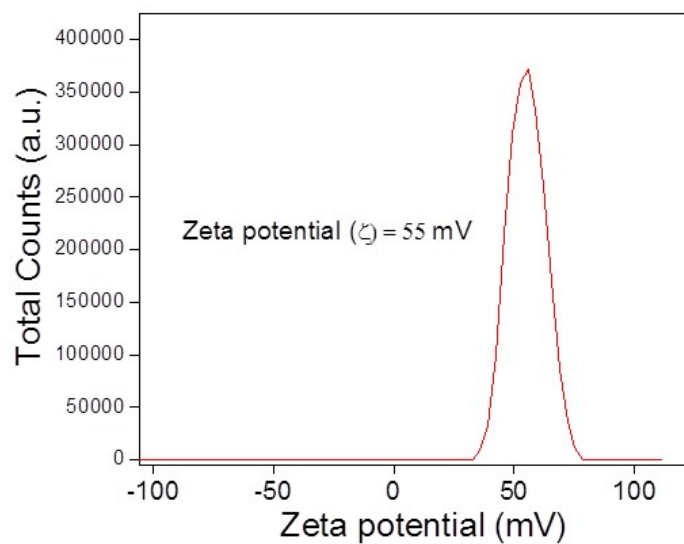

**Fig. S2** Zeta potential analysis of PD-CNDs.

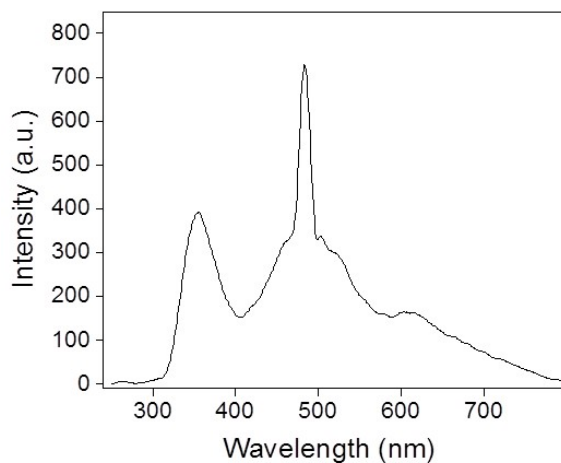

**Fig. S3** Fluorescence emission spectrum of PD-CNDs dispersion in water at an excitation of 240 nm.

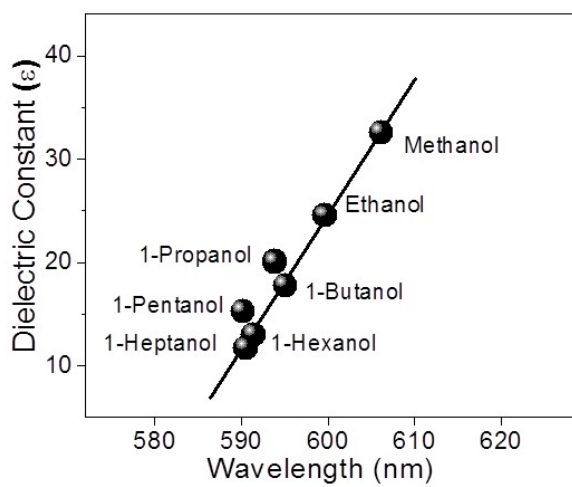

**Fig. S4** Plot of fluorescence emission maximum values of PD-CNDs dispersions in *n*-alcohols versus dielectric constant ( $\epsilon$ ).

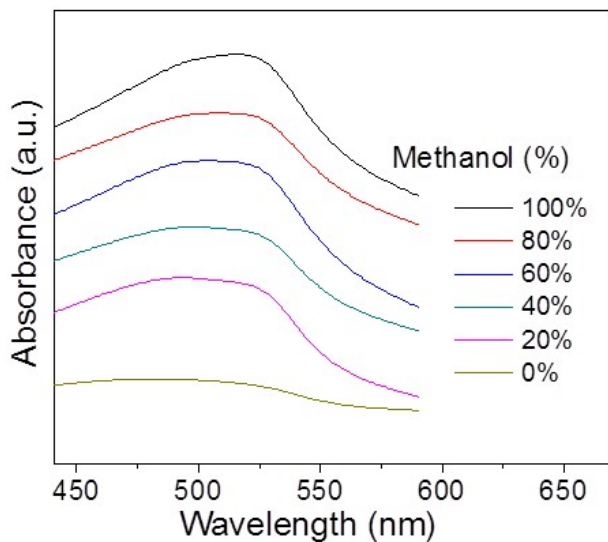

**Fig. S5** UV-visible absorption spectra of PD-CNDs dispersions in methanol-1,4-dioxane mixtures.

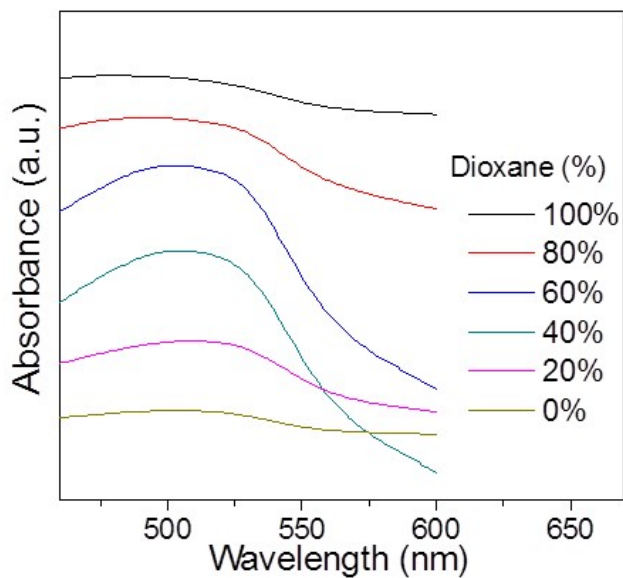

**Fig. S6** UV-visible absorption spectra of PD-CNDs dispersions in 1,4-dioxane-water mixtures.
